# Supplementary material for: Evolution of Neutral and Flowering Genes along Pearl Millet (Pennisetum glaucum) Domestication
Source: PubMed Central journal article supplement (PMC3351476; doi:10.1371/journal.pone.0036642), 2012-05-14
Supplement: pone.0036642.s001.pdf [file pone.0036642.s001.pdf]

Table S1. List of the primers used in this study for PCR amplification and sequencing.

| Locus Name                     | Primer name         | Sequence 5'-3'             |
|--------------------------------|---------------------|----------------------------|
| <b>candidate genes primers</b> |                     |                            |
| <b><i>PgHd3a</i></b>           | FT F*               | GGGACAGGGACCCGTTGG         |
|                                | FT R*               | GCGGGCCGAGGTGATAGAG        |
| <b><i>PgPHYC</i></b>           | phyc F*             | ATCGTCTTCACCAGCTTCTGGCTT   |
|                                | phyc R*             | AACACACCAATCATCTTGTATTGGTC |
| <b><i>PgDwarf8</i></b>         | F2d*                | CTCGAGATGGCCATGGGGATGGG    |
|                                | R2a*                | GTGCGCTCAGTGCCCTCGCA       |
| <b>STS loci primers</b>        |                     |                            |
| <b>STS 306</b>                 | STS 306 F           | AACTCCCAAATGAGAGATTGC      |
|                                | STS 306 R           | GAGAATCGCCTGCTGTGGTAG      |
| <b>STS 344</b>                 | STS 344 F           | CGTCCTGTACCTCAGCCTTG       |
|                                | STS 344 R2*         | CGTAATCTTCGATCCAACATCTGAT  |
| <b>STS 359</b>                 | STS 359 F2*         | GAGGTCGCCGACCTTGTATATATTC  |
|                                | STS 359 R2*         | GGCAGCCTAGGTCAATGAAAGG     |
| <b>STS 476</b>                 | STS 476 F           | GACCGAGCCTTCTTTCTG         |
|                                | STS 476 R           | ACAAGTGCTGCTCAAAATTGG      |
| <b>STS 521</b>                 | STS 521 F           | ATTGGACAAGCAAATGAGCC       |
|                                | STS 521 R           | CAGCACCCAGCGTTTACTAC       |
| <b>STS 713</b>                 | STS 713 F           | CTAGTCCAAGCATTGTGAATC      |
|                                | STS 713 R           | TCTGGATGCACCATAACC         |
| <b>STS 870</b>                 | STS 870 F           | TGGAACATCTGAAGTGCCTCA      |
|                                | STS 870 R           | GGAGCTAAGCATAGAAGCAGCA     |
| <b>STS 738</b>                 | STS 738 F           | CATCAGCATGTGAGCATCG        |
|                                | STS 738 R           | TCCACAGTGAGCAACCTCAG       |
|                                | Sequencing STS 738* |                            |
|                                | STS 738 intA F      | TACTGAAAGGAGATCAACACGTTGC  |
|                                | STS 738 intB R      | CCTTACTCTCTGAACTTCTGCATC   |

\* Primers designed for this study.

The same primers were used for PCR amplification and sequencing except internal primers for STS 738
