# Supplementary material for: Evolution of Neutral and Flowering Genes along Pearl Millet (Pennisetum glaucum) Domestication
Source: PubMed Central journal article supplement (PMC3351476; doi:10.1371/journal.pone.0036642), 2012-05-14
Supplement: pone.0036642.s003.pdf [file pone.0036642.s003.pdf]

Table S3. Genetic diversity and tests for neutrality for the 8 STS loci.

|         |       | Sample size | Length | S <sup>a</sup> | Sin <sup>b</sup> | Specific sites <sup>c</sup> | $\pi^d$ (10 <sup>-3</sup> ) | $\theta^d$ (10 <sup>-3</sup> ) | LSin <sup>e</sup> | Early/Late $\pi$ ratio | Tajima's D <sup>f</sup> |
|---------|-------|-------------|--------|----------------|------------------|-----------------------------|-----------------------------|--------------------------------|-------------------|------------------------|-------------------------|
| STS 306 | Early | 26          | 563    | 5              | 2                | 2                           | 2.55                        | 2.33                           | 1                 | 1.93                   | 0.27ns                  |
|         | Late  | 21          | 563    | 3              | 0                | 0                           | 1.32                        | 1.48                           | 0                 |                        | -0.29ns                 |
| STS 344 | Early | 20          | 710    | 23             | 8                | 8                           | 10.6                        | 9.37                           | 6                 | 1.3                    | 0.53ns                  |
|         | Late  | 20          | 710    | 26             | 9                | 10                          | 8.1                         | 10.6                           | 7                 |                        | -0.89ns                 |
| STS 359 | Early | 23          | 440    | 11             | 2                | 3                           | 7.18                        | 7.34                           | 2                 | 0.97                   | -0.07ns                 |
|         | Late  | 21          | 440    | 12             | 3                | 4                           | 7.38                        | 8.5                            | 3                 |                        | -0.12ns                 |
| STS 476 | Early | 29          | 752    | 6              | 3                | 1                           | 1.96                        | 2.04                           | 2                 | 0.77                   | -0.11ns                 |
|         | Late  | 26          | 752    | 9              | 4                | 2                           | 2.53                        | 3.15                           | 4                 |                        | -0.63ns                 |
| STS 521 | Early | 24          | 617    | 23             | 16               | 12                          | 7.1                         | 10.69                          | 9                 | 1.48                   | -1.23ns                 |
|         | Late  | 18          | 617    | 14             | 10               | 5                           | 4.81                        | 7.05                           | 3                 |                        | -1.19ns                 |
| STS 713 | Early | 24          | 1065   | 17             | 13               | 13                          | 2.18                        | 4.45                           | 8                 | 0.62                   | -1.83*                  |
|         | Late  | 21          | 1065   | 16             | 5                | 11                          | 3.49                        | 4.24                           | 3                 |                        | -0.65ns                 |
| STS 738 | Early | 11          | 1995   | 31             | 16               | 15                          | 4.7                         | 5.35                           | 7                 | 0.92                   | -0.56ns                 |
|         | Late  | 14          | 1995   | 50             | 35               | 33                          | 5.1                         | 8.01                           | 14                |                        | -1.59ns                 |
| STS 870 | Early | 22          | 744    | 23             | 10               | 8                           | 8.16                        | 9.42                           | 6                 | 1.04                   | -0.50ns                 |
|         | Late  | 23          | 744    | 25             | 14               | 9                           | 7.8                         | 10.09                          | 7                 |                        | -0.85ns                 |
| Average | Early | 22          | 860    | 17             | 9                | 8                           | 5.55                        | 6.37                           | 5                 | 1.13                   | -0.44                   |
|         | Late  | 20          | 860    | 19             | 10               | 9                           | 5.1                         | 6.64                           | 5                 |                        | -0.78                   |

<sup>a</sup>S: number of segregating sites. <sup>b</sup>Sin: number of singletons. <sup>c</sup>Specific sites: sites polymorphic in one population but monomorphic in the other. <sup>d</sup> $\theta$ : Watterson estimator of sequence diversity per site,  $\pi$ : average number of differences per site between two sequences. <sup>e</sup>Number of lineages with at least one singleton. <sup>f</sup>D values were calculated using Fabsim, *P*-values of D were calculated for the standard coalescent model (\*:  $p < 0.05$  ; ns: not significant). *P*-values were computed without correction for multiple tests.
