# Supplementary material for: Evolution of Neutral and Flowering Genes along Pearl Millet (Pennisetum glaucum) Domestication
Source: PubMed Central journal article supplement (PMC3351476; doi:10.1371/journal.pone.0036642), 2012-05-14
Supplement: pone.0036642.s004.pdf [file pone.0036642.s004.pdf]

Table S4. *Fst* values between wild and domestic populations and between early and late landraces.

|                 | Wild vs Domestic <sup>a</sup> | Early vs Late <sup>a</sup> |
|-----------------|-------------------------------|----------------------------|
| STS 306         | 0.288 <sup>***</sup>          | 0.177 <sup>**</sup>        |
| STS 344         | 0.26 <sup>***</sup>           | 0.10 <sup>*</sup>          |
| STS 359         | 0.09 <sup>**</sup>            | 0.035 <sup>ns</sup>        |
| STS 476         | 0.11 <sup>***</sup>           | -0.013 <sup>ns</sup>       |
| STS 521         | 0.021 <sup>ns</sup>           | 0.029 <sup>ns</sup>        |
| STS 713         | 0.081 <sup>**</sup>           | 0.03 <sup>ns</sup>         |
| STS 738         | -0.016 <sup>ns</sup>          | -0.03 <sup>ns</sup>        |
| STS 870         | 0.127 <sup>***</sup>          | 0.009 <sup>ns</sup>        |
| Average         | 0.12                          | 0.04                       |
| <i>PgHd3a</i>   | 0.12 <sup>***</sup>           | -0.008 <sup>ns</sup>       |
| <i>PgDwarf8</i> | 0.095 <sup>*</sup>            | -0.026 <sup>ns</sup>       |
| <i>PgPHYC</i>   | 0.077 <sup>ns</sup>           | 0.042 <sup>ns</sup>        |

*Fst* values were estimated for each of the STS loci and the candidate genes. <sup>a</sup>*P*-values were computed without correction for multiple tests. (\*\*\*:  $p < 0.001$ ; \*\*:  $p < 0.01$ ; \*:  $p < 0.05$ ; ns: not significant).
