# Supplementary material for: Evolution of Neutral and Flowering Genes along Pearl Millet (Pennisetum glaucum) Domestication
Source: PubMed Central journal article supplement (PMC3351476; doi:10.1371/journal.pone.0036642), 2012-05-14
Supplement: pone.0036642.s005.pdf [file pone.0036642.s005.pdf]

Table S5. Estimates of demographic and genetic population parameters obtained from the demographic model “without migration”.

| Parameter <sup>a</sup> | median                | 95%HPD interval <sup>b</sup>                  |
|------------------------|-----------------------|-----------------------------------------------|
| $\theta_w$             | 0.0061                | 0.0036 – 0.0106                               |
| $\theta_{D0}$          | $3.91 \times 10^{-4}$ | $3.05 \times 10^{-5}$ – 0.0042                |
| $\theta_{D1}$          | 0.1015                | 0.0080 – 3.4419                               |
| T                      | 0.0295                | 0.0082 – 0.0809                               |
| $\mu$                  | $2.52 \times 10^{-8}$ | $7.98 \times 10^{-9}$ – $7.66 \times 10^{-8}$ |

<sup>a</sup> $\theta_w$  is the population mutation rate of the wild population,  $\theta_{D0}$  is the population mutation rate of the domestic population at domestication time,  $\theta_{D1}$  is the population mutation rate of the domestic population at present time, T is the time of domestication in units of  $4N_e$  generations, and  $\mu$  is the mutation rate per bp per generation. <sup>b</sup>HPD interval is the interval of parameter values with the highest posterior density.
