# Supplementary material for: Evolution of Neutral and Flowering Genes along Pearl Millet (Pennisetum glaucum) Domestication
Source: PLoS One. 2012 May 14;7(5):e36642. doi: 10.1371/journal.pone.0036642 (PMC3351476; doi:10.1371/journal.pone.0036642)
Supplement: Table S2 — List of accessions sequenced for the eight STS loci and the three candidate genes. (PDF) [file pone.0036642.s002.pdf]

Table S2. List of accessions sequenced for the eight STS loci and the three candidate genes.

| Accession<br>code | Type of<br>population collected | Phenotype of<br>the individual | Geographic<br>origin  | STS306 | STS344 | STS359 | STS476 | STS521 | STS713 | STS 738 | STS870 | PgDwarfβ | PgPHYC | PgHd3a |
|-------------------|---------------------------------|--------------------------------|-----------------------|--------|--------|--------|--------|--------|--------|---------|--------|----------|--------|--------|
| 115.98            | Domesticated                    | Early                          | 23DB                  | +      | +      | +      | +      | +      | +      |         |        | +        |        | +      |
| 603.80            | Domesticated                    | Early                          | Algeria               |        |        |        | +      |        |        |         |        |          |        | +      |
| 75.09             | Domesticated                    | Early                          | Benin                 | +      | +      | +      | +      | +      | +      | +       | +      | +        | +      | +      |
| 310.90            | Domesticated                    | Early                          | Benin                 |        |        |        | +      |        | +      |         |        |          |        | +      |
| IRD2003-Tb5       | Domesticated                    | Early                          | Benin                 | +      |        | +      | +      | +      | +      |         | +      | +        |        | +      |
| IRD2003-Tb6       | Domesticated                    | Early                          | Benin                 |        |        |        |        | +      |        |         |        |          |        | +      |
| 35.95             | Domesticated                    | Early                          | Burkina-Faso          | +      | +      |        | +      | +      |        |         |        |          | +      |        |
| 53.09             | Domesticated                    | Early                          | Burkina-Faso          | +      | +      | +      | +      |        | +      | +       | +      | +        | +      | +      |
| 133.98            | Domesticated                    | Early                          | China                 | +      | +      | +      | +      | +      | +      |         | +      |          |        |        |
| 604.80            | Domesticated                    | Early                          | India                 |        |        |        | +      |        |        |         | +      |          |        | +      |
| 230.90            | Domesticated                    | Early                          | India                 | +      | +      | +      | +      | +      | +      |         | +      | +        | +      |        |
| 1390.84           | Domesticated                    | Early                          | Kenya                 | +      | +      | +      | +      | +      | +      |         | +      |          | +      | +      |
| 223.90            | Domesticated                    | Early                          | Mali                  | +      | +      | +      | +      |        | +      |         |        |          |        | +      |
| 225.90            | Domesticated                    | Early                          | Maroc                 |        |        |        |        |        |        |         |        |          |        | +      |
| 250.86            | Domesticated                    | Early                          | Maroc                 | +      |        | +      | +      | +      | +      | +       | +      |          | +      |        |
| IRD2003-Tb42      | Domesticated                    | Early                          | Mauritania            | +      |        | +      | +      | +      | +      | +       | +      |          | +      | +      |
| 72.88             | Domesticated                    | Early                          | Mauritania            |        |        |        | +      |        |        |         | +      | +        |        | +      |
| 77.88             | Domesticated                    | Early                          | Mauritania            | +      | +      | +      | +      | +      | +      | +       | +      |          | +      |        |
| 154.93            | Domesticated                    | Early                          | Niger                 | +      |        |        |        | +      |        |         |        |          |        |        |
| 132.09            | Domesticated                    | Early                          | Niger                 | +      | +      | +      | +      | +      | +      | +       | +      | +        | +      | +      |
| 156.09            | Domesticated                    | Early                          | Niger                 | +      | +      | +      | +      | +      | +      | +       | +      | +        | +      | +      |
| 45.09             | Domesticated                    | Early                          | Nigeria               | +      | +      | +      | +      | +      | +      |         | +      | +        | +      | +      |
| 492.76            | Domesticated                    | Early                          | Nigeria               |        |        |        |        |        |        |         |        | +        |        |        |
| 459.76            | Domesticated                    | Early                          | Nigeria               | +      | +      | +      | +      | +      | +      | +       | +      |          | +      |        |
| 175.79            | Domesticated                    | Early                          | Ouganda               |        | +      |        |        | +      | +      | +       |        |          | +      | +      |
| IRD2003-Tb67      | Domesticated                    | Early                          | Pakistan              | +      | +      | +      | +      |        | +      |         |        |          | +      | +      |
| 580.91            | Domesticated                    | Early                          | Rajasthan             |        |        |        | +      |        |        |         |        |          |        | +      |
| 581.91            | Domesticated                    | Early                          | Rajasthan             | +      |        |        |        |        |        |         | +      |          |        |        |
| 206.98            | Domesticated                    | Early                          | Senegal               | +      |        |        |        | +      |        |         |        |          |        |        |
| 176.98            | Domesticated                    | Early                          | Senegal               | +      | +      | +      | +      | +      | +      | +       | +      | +        |        | +      |
| 229.90            | Domesticated                    | Early                          | Senegal               | +      | +      | +      | +      |        | +      |         | +      |          |        | +      |
| 188.98            | Domesticated                    | Early                          | Tchad                 | +      |        | +      | +      | +      | +      |         | +      | +        | +      | +      |
| 222.09            | Domesticated                    | Early                          | Tchad                 | +      | +      | +      | +      | +      | +      |         | +      | +        | +      | +      |
| 224.09            | Domesticated                    | Early                          | Tchad                 | +      | +      | +      | +      | +      | +      |         | +      | +        | +      | +      |
| 1427.84           | Domesticated                    | Early                          | Tunisie               |        | +      | +      | +      |        | +      | +       | +      | +        | +      | +      |
| 293.89            | Domesticated                    | Early                          | Tunisie               | +      |        | +      | +      | +      |        |         |        |          | +      | +      |
| 78.09             | Domesticated                    | Late                           | Benin                 |        |        |        |        |        |        |         | +      |          | +      | +      |
| 81.09             | Domesticated                    | Late                           | Benin                 |        |        |        |        |        |        |         |        |          | +      |        |
| 84.09             | Domesticated                    | Late                           | Benin                 |        |        |        |        |        |        |         |        |          | +      |        |
| 85.09             | Domesticated                    | Late                           | Benin                 | +      | +      | +      | +      |        | +      | +       | +      | +        |        | +      |
| 86.09             | Domesticated                    | Late                           | Benin                 | +      | +      | +      | +      | +      | +      | +       |        |          |        | +      |
| 87.09             | Domesticated                    | Late                           | Benin                 | +      |        |        | +      | +      | +      |         | +      |          |        |        |
| IRD2003-Tb7       | Domesticated                    | Late                           | Benin                 |        | +      |        | +      |        |        |         |        |          |        | +      |
| 55.09             | Domesticated                    | Late                           | Burkina-Faso          | +      | +      | +      | +      | +      | +      | +       | +      | +        | +      | +      |
| 56.09             | Domesticated                    | Late                           | Burkina-Faso          | +      | +      | +      | +      | +      | +      | +       | +      | +        | +      | +      |
| 61.09             | Domesticated                    | Late                           | Centrafrican Republic | +      | +      | +      | +      | +      | +      | +       | +      | +        | +      | +      |
| 62.09             | Domesticated                    | Late                           | Centrafrican Republic | +      | +      | +      | +      | +      | +      |         | +      | +        | +      | +      |
| 207.90            | Domesticated                    | Late                           | Cameroun              | +      |        | +      | +      | +      | +      | +       | +      | +        | +      | +      |
| 208.90            | Domesticated                    | Late                           | Cameroun              |        |        |        | +      |        |        |         |        |          |        | +      |
| 73.09             | Domesticated                    | Late                           | Cameroun              | +      | +      | +      | +      | +      | +      | +       | +      | +        | +      | +      |
| 74.09             | Domesticated                    | Late                           | Cameroun              |        |        |        |        |        |        |         | +      |          |        |        |
| 25.95             | Domesticated                    | Late                           | Côte d'Ivoire         | +      |        |        |        |        |        |         |        |          |        |        |
| 68.09             | Domesticated                    | Late                           | Côte d'Ivoire         | +      | +      | +      | +      | +      | +      |         | +      | +        | +      | +      |
| 183.90            | Domesticated                    | Late                           | Guinée                |        |        |        | +      |        |        |         |        |          |        | +      |
| 187.90            | Domesticated                    | Late                           | Guinée                |        |        |        | +      |        | +      |         |        |          |        | +      |
| 629.81            | Domesticated                    | Late                           | Guinée                |        |        |        |        |        |        |         |        |          |        | +      |
| 51.09             | Domesticated                    | Late                           | Guinée                |        |        |        |        |        |        |         | +      |          | +      | +      |
| 52.09             | Domesticated                    | Late                           | Guinée                | +      | +      | +      | +      | +      | +      | +       | +      | +        |        | +      |
| 300.90            | Domesticated                    | Late                           | Mali                  | +      |        | +      | +      | +      |        | +       | +      |          |        |        |
| 66.09             | Domesticated                    | Late                           | Mali                  | +      | +      | +      | +      | +      | +      | +       | +      | +        |        | +      |
| 65.09             | Domesticated                    | Late                           | mali                  | +      | +      | +      | +      | +      | +      | +       | +      |          | +      | +      |
| 65.88             | Domesticated                    | Late                           | Mauritania            |        | +      |        | +      |        | +      | +       |        |          |        | +      |
| 16.08             | Domesticated                    | Late                           | Niger                 | +      | +      | +      | +      | +      | +      |         | +      |          | +      | +      |
| 77.08             | Domesticated                    | Late                           | Niger                 | +      | +      | +      | +      | +      | +      |         | +      |          |        | +      |
| 48.09             | Domesticated                    | Late                           | Nigeria               | +      | +      | +      | +      | +      | +      |         | +      | +        | +      | +      |
| 178.90            | Domesticated                    | Late                           | Centrafrican Republic |        |        |        | +      |        |        |         |        |          | +      |        |
| 72                | Domesticated                    | Late                           | Centrafrican Republic |        |        |        |        |        |        |         |        |          |        | +      |
| 69.09             | Domesticated                    | Late                           | Senegal               | +      | +      | +      | +      | +      | +      | +       | +      | +        |        | +      |
| 70.09             | Domesticated                    | Late                           | Senegal               |        | +      | +      |        |        |        | +       | +      |          | +      |        |
| 60.06             | Domesticated                    | Late                           | Senegal               |        |        |        |        |        |        |         |        | +        |        |        |
| 61.06             | Domesticated                    | Late                           | Senegal               |        |        |        |        |        |        |         |        | +        |        | +      |
| 63.06             | Domesticated                    | Late                           | Senegal               |        |        |        |        |        |        |         |        | +        |        | +      |
| 44.09             | Domesticated                    | Late                           | Tchad                 | +      | +      | +      | +      | +      | +      | +       | +      | +        | +      | +      |
| 211.9             | Domesticated                    | Late                           | Togo                  |        |        | +      |        |        |        |         |        |          |        |        |
| 67.09             | Domesticated                    | Late                           | uganda                | +      | +      | +      | +      | +      | +      |         | +      | +        | +      | +      |
| 1.81              | Domesticated                    | Undetrmined                    | Niger                 |        |        |        |        |        |        |         |        |          |        |        |
| 206.81            | Domesticated                    | Undetrmined                    | Nigeria               | +      | +      | +      | +      | +      | +      | +       | +      | +        | +      |        |
| 992.84            | Domesticated                    | Undetrmined                    | Soudan                | +      |        | +      | +      | +      | +      |         | +      |          |        | +      |
| 1057.84           | Domesticated                    | Undetrmined                    | Tanzania              |        |        |        | +      |        | +      |         |        |          |        | +      |
| 296.82            | Domesticated                    | Undetrmined                    | Tanzania              |        |        |        |        |        |        |         |        | +        | +      |        |
| IRD2003-Tb88      | Domesticated                    | Undetrmined                    | Tanzania              | +      | +      | +      | +      | +      | +      |         | +      | +        | +      | +      |
| 224.76            | Domesticated                    | Undetrmined                    | Tchad                 | +      |        | +      | +      | +      | +      | +       |        |          | +      | +      |
| 212.90            | Domesticated                    | Undetrmined                    | Tchad                 |        |        |        |        |        | +      | +       |        |          |        |        |
| 169.81            | Domesticated                    | Undetrmined                    | Zambia                |        | +      | +      | +      |        |        | +       | +      |          |        | +      |
| IRD2003-Tb8       | Wild                            |                                | Benin                 |        |        |        |        |        |        |         |        | +        |        | +      |
| 8.95              | Wild                            |                                | Burkina-Faso          |        |        | +      |        |        |        |         | +      |          |        |        |
| 7.95              | Wild                            |                                | Burkina-Faso          | +      | +      | +      | +      | +      | +      | +       | +      | +        | +      |        |
| 1717.84           | Wild                            |                                | Cameroun              | +      | +      | +      | +      | +      | +      |         | +      |          | +      | +      |
| IRD2003-Tb19      | Wild                            |                                | Cameroun              |        |        |        |        |        |        |         |        | +        |        |        |
| 9.95              | Wild                            |                                | Mali                  |        |        |        |        |        |        |         |        |          |        | +      |
| 289.92            | Wild                            |                                | Mali                  |        |        |        |        |        |        |         |        | +        |        |        |
| 334.82            | Wild                            |                                | Mali                  | +      | +      | +      | +      | +      | +      |         | +      |          | +      |        |
| 10.95             | Wild                            |                                | Mali                  | +      | +      |        | +      | +      | +      |         |        |          |        |        |
| P8470             | Wild                            |                                | Mali                  | +      | +      |        | +      | +      | +      | +       | +      | +        | +      |        |
| P8473             | Wild                            |                                | Mali                  |        | +      | +      | +      |        | +      | +       |        | +        | +      | +      |
| P8475             | Wild                            |                                | Mali                  | +      | +      |        | +      | +      | +      | +       | +      | +        | +      |        |
| 71.88             | Wild                            |                                | Mauritania            | +      |        | +      |        | +      | +      |         | +      |          |        |        |
| 60.88             | Wild                            |                                | Mauritania            |        | +      | +      |        | +      |        | +       |        |          |        |        |
| P8491             | Wild                            |                                | Mauritania            |        |        | +      |        |        | +      | +       | +      |          | +      |        |
| P8493             | Wild                            |                                | Mauritania            | +      |        |        | +      | +      | +      | +       | +      | +        | +      |        |
| p8497             | Wild                            |                                | Mauritania            |        | +      | +      | +      | +      | +      | +       | +      | +        | +      |        |
| 2.95              | Wild                            |                                | Niger                 |        |        |        |        |        |        |         |        |          | +      |        |
| 4.95              | Wild                            |                                | Niger                 | +      | +      | +      | +      | +      | +      | +       | +      | +        |        | +      |
| 274 Alzou         | Wild                            |                                | Niger                 |        |        |        |        |        |        |         |        |          |        | +      |
| 41Alzou           | Wild                            |                                | Niger                 |        |        |        |        |        | +      |         |        |          |        | +      |
| 307.90            | Wild                            |                                | Nigeria               |        |        |        |        |        |        |         |        |          |        |        |
| 308.90            | Wild                            |                                | Nigeria               | +      |        | +      | +      | +      | +      | +       | +      |          |        |        |
| 327.95            | Wild                            |                                | Nigeria               |        |        | +      |        |        |        |         | +      |          |        |        |
| 306.90            | Wild                            |                                | Nigeria               | +      |        |        |        | +      | +      |         | +      |          | +      |        |
| IRD2003-Tb70      | Wild                            |                                | Centrafrican Republic | +      | +      | +      | +      | +      | +      | +       | +      | +        | +      | +      |
| 13.95             | Wild                            |                                | Senegal               | +      |        |        | +      | +      |        |         |        |          |        |        |
| 479.76            | Wild                            |                                | Senegal               | +      | +      | +      | +      | +      | +      |         | +      |          | +      | +      |
| 357.82            | Wild                            |                                | Senegal               | +      |        |        |        | +      | +      | +       | +      | +        | +      | +      |
| 176.90            | Wild                            |                                | Soudan                | +      |        | +      | +      | +      | +      |         | +      |          | +      | +      |
| 177.90            | Wild                            |                                | Soudan                |        |        | +      |        |        | +      |         | +      |          |        |        |
| 214.90            | Wild                            |                                | Tchad                 |        |        |        |        |        |        |         |        |          |        | +      |
| 216.90            | Wild                            |                                | Tchad                 | +      |        |        | +      | +      | +      |         |        |          |        | +      |
| 16.95             | Wild                            |                                | Tchad                 |        |        | +      |        |        |        |         | +      |          |        | +      |
| 215.90            | Wild                            |                                | Tchad                 |        |        |        |        |        | +      |         | +      |          |        | +      |
